# Supplementary material for: Extensive Transcript Diversity and Novel Upstream Open Reading Frame Regulation in Yeast
Source: PubMed Central journal article supplement (PMC3564994; doi:10.1534/g3.112.003640), 2013-02-01
Supplement: supp_3.2.343_FigureS2.pdf [file supp_3.2.343_FigureS2.pdf]

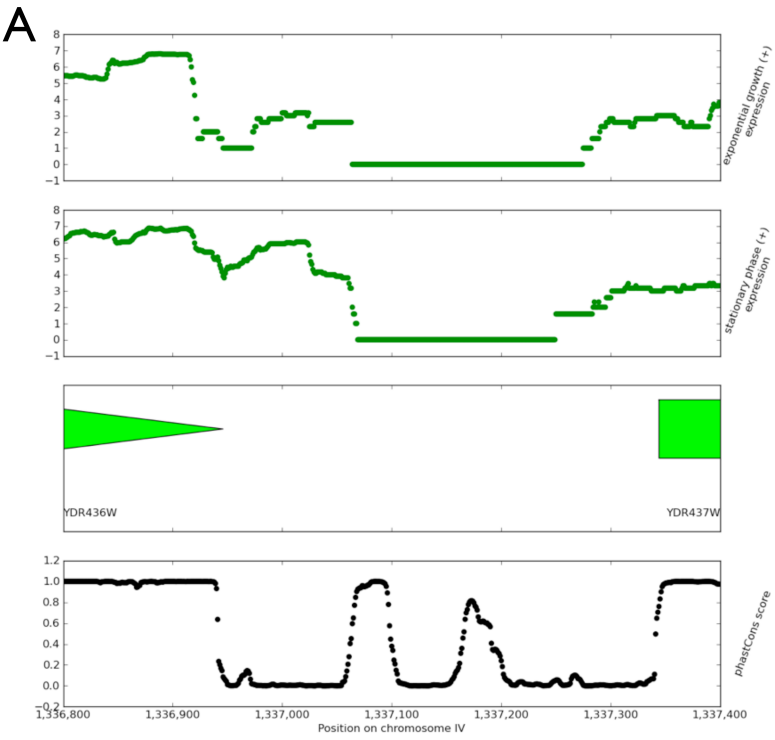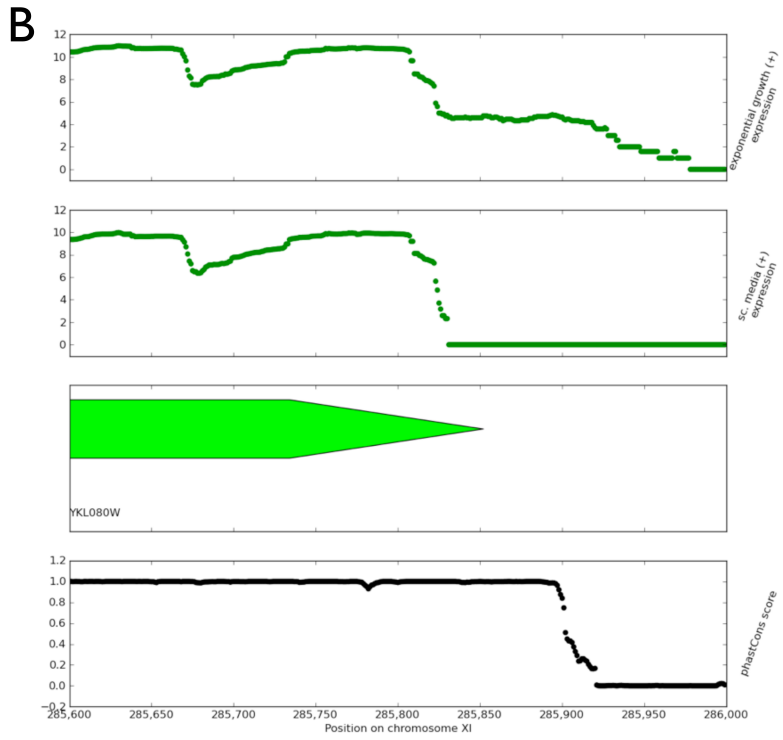

**Figure S2 Two example 3' truncations.** A: A close-up of the 3' end of the *PPZ2* gene. Note the log scale of the expression data. B: A close-up of the 3' end of the *VMA5* gene. In each case, the top track shows expression under the exponential growth in YPAD condition; the second track shows expression under the stationary phase condition; the third track shows the location of annotated ORFs; and the fourth track shows the phastCons conservation score (Siepel et al. 2005).
