# Supplementary material for: Extensive Transcript Diversity and Novel Upstream Open Reading Frame Regulation in Yeast
Source: PubMed Central journal article supplement (PMC3564994; doi:10.1534/g3.112.003640), 2013-02-01
Supplement: supp_3.2.343_FigureS3.pdf [file supp_3.2.343_FigureS3.pdf]

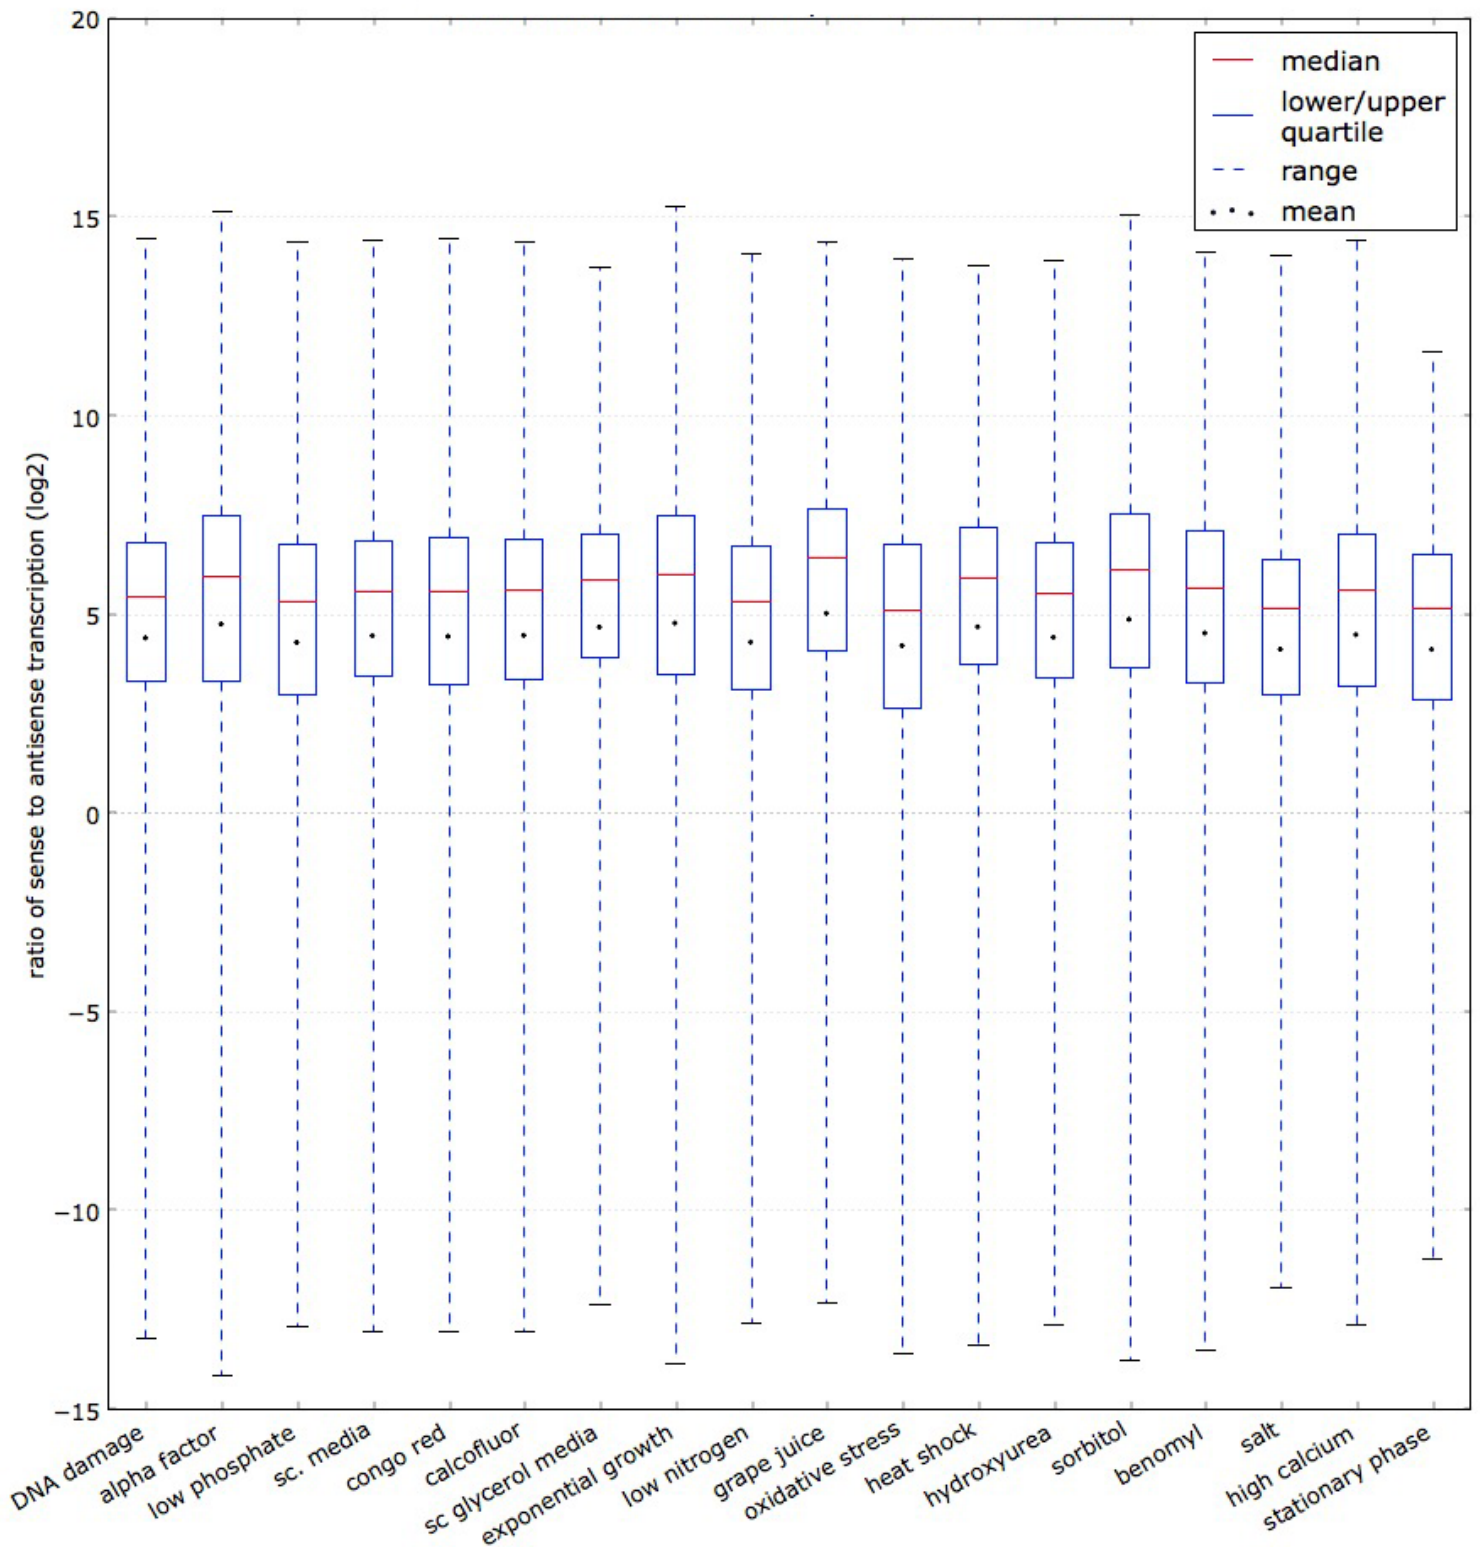

**Figure S3 Antisense transcription.** Shows average (mean and median) antisense transcription levels across all ORFs.
