# Supplementary material for: Extensive Transcript Diversity and Novel Upstream Open Reading Frame Regulation in Yeast
Source: PubMed Central journal article supplement (PMC3564994; doi:10.1534/g3.112.003640), 2013-02-01
Supplement: supp_3.2.343_FileS1.pdf [file supp_3.2.343_FileS1.pdf]

## File S1

### Supporting Materials

Description of low phosphate medium:

Low Phosphate YPD (LP-YPD) Medium

1. Combine: 5 g Yeast Extract

10 g Peptone

1.23 g  $\text{MgSO}_4$

475 ml dH<sub>2</sub>O

2. Stir until completely dissolved (>15 minutes).
3. With vigorous stirring, slowly add 4 ml of concentrated  $\text{NH}_4\text{OH}$  dropwise.
4. Remove from stir plate. Allow salts to precipitate for  $\geq 30$  minutes at room temperature.
5. Vacuum filter with 1.2  $\mu\text{m}$  filter circle (or gravity filter with Whatman #1 paper).
6. Vacuum filter with 0.22  $\mu\text{m}$  filter circle (or gravity filter with Whatman #2 paper).
7. Add 10 g dextrose (or galactose) and dissolve.
8. Adjust to pH 6.5 - 7.0 with 6 M HCl.
9. Autoclave or filter sterilize. Store at 4°C.
